# Supplementary material
Source: PubMed Central journal article supplement (PMC5989630)
Supplement: jiy165_suppl_supplementary_material.pdf [file jiy165_suppl_supplementary_material.pdf]

## SUPPLEMENTAL MATERIAL

Supplemental Table 1. HPV vaccine-related questions and responses included in the household interview for female and male participants aged 9-59 years (NHANES, 2011-2016).

Supplemental Table 2. Inadequate responses to the HPV vaccine section of the interview among female and male participants aged 9-26 years (NHANES, 2011-2016).

Supplemental Table 3. Factors associated with inadequate HPV vaccine data among female and male participants aged 9-26 years (NHANES, 2011-2016).

Supplemental Table 4. Age- and race-specific prevalence of inadequate HPV vaccination data over time among males and females aged 9-26 years (NHANES, 2011-2016).

Supplemental Table 5. Prevalence difference in HPV vaccination ( $\geq 1$  dose) among male and female participants aged 9-26 years between 2011-2012 and 2015-2016 (NHANES).

Supplemental Table 6. Sensitivity analysis: comparison of temporal trends in HPV vaccination ( $\geq 1$  dose) using complete case and imputation methods for inadequate HPV vaccine data (NHANES, 2011-2016).

Supplemental Table 7. Sensitivity analysis: temporal trends in the percentage of males and females who initiated the HPV vaccine ( $\geq 1$  dose) prior to their 27<sup>th</sup> birthday among participants aged 9-59 years (NHANES, 2011-2016).

Supplemental Figure 1. Sensitivity analysis: Comparison of estimates for HPV vaccination ( $\geq 1$  dose) among participants 13-17 years of age in the NHANES database and the National Immunization Survey—Teen database (2011-2016).

## SUPPLEMENTAL MATERIAL

**Supplemental Table 1. HPV vaccine-related questions and responses included in the household interview for female and male participants aged 9-59 years (NHANES, 2011-2016).**

| Variable                      | Question                                                                                                                                                                                                                                                                                                | Responses                                                 |
|-------------------------------|---------------------------------------------------------------------------------------------------------------------------------------------------------------------------------------------------------------------------------------------------------------------------------------------------------|-----------------------------------------------------------|
| <b>NHANES 2011-2014</b>       |                                                                                                                                                                                                                                                                                                         |                                                           |
| IMQ040<br>(Females)           | Human Papillomavirus (HPV) vaccine is given to prevent cervical cancer in girls and women. There are two HPV vaccines available called Cervarix and Gardasil. It is given in 3 separate doses over a 6-month period. {Have you/Has SP} ever received one or more doses of the HPV vaccine?              | 1 Yes<br>2 No<br>7 Refused<br>9 Don't know                |
| IMQ070<br>(Males)             | Human Papillomavirus (HPV) vaccine is given to prevent HPV infection and genital warts in boys and men. It is given in 3 separate doses over a 6-month period. {Have you/Has SP} ever received one or more doses of the HPV vaccine? (The brand name for the vaccine is Gardasil.)                      | 1 Yes<br>2 No<br>7 Refused<br>9 Don't know                |
| IMQ090<br>(Males and Females) | How old {were you/was SP} when {you/SP} received your first dose of {Cervarix/Gardasil/the vaccine}?                                                                                                                                                                                                    | (range)<br>777 Refused<br>999 Don't know                  |
| IMQ045<br>(Males and Females) | How many doses of {Cervarix/Gardasil/the vaccine} {have you/has SP} received?                                                                                                                                                                                                                           | 1 Dose<br>2 Doses<br>3 Doses<br>7 Refused<br>9 Don't know |
| <b>NHANES 2015-2016</b>       |                                                                                                                                                                                                                                                                                                         |                                                           |
| IMQ060<br>(Females)           | Human Papillomavirus (HPV) vaccine is given to prevent cervical cancer in girls and women. The HPV vaccines available are called Cervarix, Gardasil or <u>Gardasil 9</u> . It is given in 3 separate doses over a 6-month period. {Have you/Has SP} ever received one or more doses of the HPV vaccine? | 1 Yes<br>2 No<br>7 Refused<br>9 Don't know                |
| IMQ070<br>(Males)             | Human Papillomavirus (HPV) vaccine is given to prevent HPV infection and genital warts in boys and men. It is given in 3 separate doses over a 6-month period. {Have you/Has SP} ever received one or more doses of the HPV vaccine? (The brand name for the vaccine is Gardasil.)                      | 1 Yes<br>2 No<br>7 Refused<br>9 Don't know                |
| IMQ090<br>(Males and Females) | How old {were you/was SP} when {you/SP} received your first dose of {Cervarix/Gardasil/Gardasil 9/Gardasil or Gardasil 9/the vaccine}?                                                                                                                                                                  | (range)<br>777 Refused<br>999 Don't know                  |
| IMQ100<br>(Males and Females) | How many doses of {Cervarix/Gardasil/Gardasil or <u>Gardasil 9</u> /the vaccine} {have you/has SP} received?                                                                                                                                                                                            | 1 Dose<br>2 Doses<br>3 Doses<br>7 Refused<br>9 Don't know |

## SUPPLEMENTAL MATERIAL

**Supplemental Table 2. Inadequate responses to the HPV vaccine section of the interview among female and male participants aged 9-26 years (NHANES, 2011-2016).**

|                               | <b>Overall</b> | <b>2011-2012</b> | <b>2013-2014</b> | <b>2015-2016</b> |
|-------------------------------|----------------|------------------|------------------|------------------|
| <b>Females (IMQ040/IMQ60)</b> | N=4033         | N=1304           | N=1405           | N=1324           |
| Refused to answer             | 5 (0.1%)       | 2 (0.2%)         | 0 (0.0%)         | 3 (0.2%)         |
| Don't know                    | 246 (6.1%)     | 69 (5.3%)        | 72 (5.1%)        | 105 (7.9%)       |
| No information                | 2 (0.1%)       | 0 (0.0%)         | 2 (0.1%)         | 0 (0.0%)         |
| <b>Males (IMQ070)</b>         | N=4007         | N=1320           | N=1388           | N=1299           |
| Refused to answer             | 3 (0.1%)       | 0 (0.0%)         | 0 (0.0%)         | 3 (0.2%)         |
| Don't know                    | 413 (10.3%)    | 105 (8.0%)       | 138 (9.9%)       | 170 (13.1%)      |
| No information                | 3 (0.1%)       | 1 (0.1%)         | 2 (0.1%)         | 0 (0.0%)         |

Note: Data are unweighted sample sizes (N) and unweighted column percentages (no. [%]). Participants with an inadequate response to the HPV section of the interview were treated as "missing" in the primary analysis.

## SUPPLEMENTAL MATERIAL

**Supplemental Table 3. Factors associated with inadequate HPV vaccine data among female and male participants aged 9-26 years (NHANES, 2011-2016).**

|                           | Females |                |         | Males |                  |         |
|---------------------------|---------|----------------|---------|-------|------------------|---------|
|                           | N       | % (95% CI)     | P value | N     | % (95% CI)       | P value |
| <b>Survey period</b>      |         |                | 0.208   |       |                  | 0.173   |
| 2011-2012                 | 1304    | 4.0 (2.7-5.8)  |         | 1320  | 8.4 (5.1-13.5)   |         |
| 2013-2014                 | 1405    | 4.9 (3.4-7.1)  |         | 1388  | 10.7 (9.3-12.3)  |         |
| 2015-2016                 | 1324    | 6.0 (4.8-7.6)  |         | 1299  | 12.6 (10.6-15.0) |         |
| <b>Age group, y</b>       |         |                | 0.117   |       |                  | <0.001  |
| 9-10                      | 638     | 4.7 (3.2-6.8)  |         | 650   | 6.8 (4.8-9.6)    |         |
| 11-12                     | 603     | 5.3 (3.4-8.1)  |         | 581   | 5.4 (3.4-8.4)    |         |
| 13-17                     | 1273    | 4.2 (3.0-5.8)  |         | 1299  | 8.6 (6.9-10.8)   |         |
| 18-21                     | 747     | 7.0 (5.0-9.6)  |         | 750   | 13.8 (10.0-18.8) |         |
| 22-26                     | 772     | 4.4 (3.0-6.3)  |         | 727   | 13.6 (11.0-16.7) |         |
| <b>Race/ethnicity</b>     |         |                | <0.001  |       |                  | 0.008   |
| Non-Hispanic white        | 1085    | 3.4 (2.4-4.7)  |         | 1133  | 9.9 (7.9-12.3)   |         |
| Non-Hispanic Black        | 1005    | 5.5 (3.9-7.8)  |         | 1017  | 10.9 (8.2-14.2)  |         |
| Non-Hispanic Asian        | 439     | 8.6 (5.9-12.5) |         | 488   | 16.8 (13.3-21.0) |         |
| Mexican American          | 799     | 7.7 (5.4-10.9) |         | 745   | 10.9 (8.1-14.4)  |         |
| Other Hispanic            | 475     | 8.0 (5.4-11.8) |         | 414   | 13.6 (9.8-18.6)  |         |
| Multiracial/Other         | 230     | 5.4 (2.8-10.3) |         | 210   | 4.6 (2.7-7.5)    |         |
| <b>Health insurance</b>   |         |                | 0.009   |       |                  | 0.113   |
| Yes – Private             | 1674    | 3.5 (2.4-4.9)  |         | 1706  | 9.8 (7.8-12.3)   |         |
| Yes – Medicaid            | 1176    | 6.6 (4.9-8.8)  |         | 1051  | 8.7 (6.6-11.3)   |         |
| Yes – Other Public/Gov't  | 558     | 6.1 (3.8-9.7)  |         | 550   | 14.6 (9.7-21.5)  |         |
| No health insurance       | 616     | 6.9 (4.8-9.6)  |         | 687   | 11.8 (9.1-15.1)  |         |
| <b>Poverty status</b>     |         |                | 0.024   |       |                  | 0.701   |
| At or above poverty level | 2429    | 4.0 (3.1-5.3)  |         | 2465  | 10.2 (8.9-11.7)  |         |
| Below poverty level       | 1288    | 6.1 (4.6-8.0)  |         | 1188  | 11.0 (7.5-15.8)  |         |
| <b>Immigration status</b> |         |                | <0.001  |       |                  | 0.017   |
| U.S. born                 | 3473    | 4.5 (3.6-5.5)  |         | 3469  | 10.2 (8.8-11.9)  |         |
| Foreign born              | 559     | 9.8 (7.0-13.6) |         | 538   | 14.0 (10.8-18.0) |         |

Note: N refers to the unweighted sample size. Data are weighted row percentages and 95% confidence intervals (CI) of participants with inadequate HPV vaccine data (i.e., individuals excluded from the primary analysis). P values were estimated by Pearson (Rao-Scott)  $\chi^2$  tests.

## SUPPLEMENTAL MATERIAL

**Supplemental Table 4. Age- and race-specific prevalence of inadequate HPV vaccination data over time among males and females aged 9-26 years (NHANES, 2011-2016).**

|                       | 2011-2012 |                 | 2013-2014 |                  | 2015-2016 |                  |
|-----------------------|-----------|-----------------|-----------|------------------|-----------|------------------|
|                       | N         | % (95%CI)       | N         | % (95%CI)        | N         | % (95%CI)        |
| <b>Females</b>        |           |                 |           |                  |           |                  |
| <b>Age group, y</b>   |           |                 |           |                  |           |                  |
| 9-10                  | 207       | 4.0 (2.1-7.4)   | 204       | 4.8 (2.3-9.6)    | 227       | 5.3 (3.0-9.2)    |
| 11-12                 | 202       | 3.7 (1.6-8.7)   | 202       | 4.9 (1.9-11.8)   | 199       | 7.2 (4.0-12.8)   |
| 13-17                 | 398       | 1.9 (1.0-3.5)   | 454       | 5.8 (3.8-9.0)    | 421       | 5.0 (2.8-8.7)    |
| 18-21                 | 249       | 6.7 (3.6-12.0)  | 292       | 5.7 (3.2-10.0)   | 206       | 9.2 (5.5-15.1)   |
| 22-26                 | 248       | 4.4 (2.1-8.7)   | 253       | 3.5 (2.0-6.0)    | 271       | 5.3 (2.9-9.4)    |
| <b>Race/ethnicity</b> |           |                 |           |                  |           |                  |
| NH White              | 316       | 2.4 (1.2-4.8)   | 396       | 4.4 (2.7-7.3)    | 373       | 3.3 (1.9-5.8)    |
| NH Black              | 397       | 4.7 (2.9-7.5)   | 334       | 3.8 (1.8-8.1)    | 274       | 8.3 (4.7-14.4)   |
| NH Asian              | 172       | 10.1 (6.0-16.6) | 141       | 2.1 (0.6-6.8)    | 126       | 13.4 (8.6-20.2)  |
| Mexican American      | 195       | 4.0 (1.9-8.3)   | 310       | 7.2 (3.9-12.9)   | 294       | 11.5 (6.8-18.7)  |
| Other Hispanic        | 153       | 7.4 (3.2-16.3)  | 143       | 8.2 (3.9-16.5)   | 179       | 8.5 (5.4-13.3)   |
| Multiracial/Other     | 71        | 7.9 (2.2-24.5)  | 81        | 4.8 (1.8-12.5)   | 78        | 4.0 (1.6-9.5)    |
| <b>Males</b>          |           |                 |           |                  |           |                  |
| <b>Age group, y</b>   |           |                 |           |                  |           |                  |
| 9-10                  | 214       | 3.8 (2.1-6.8)   | 232       | 6.7 (3.4-13.0)   | 204       | 9.9 (5.8-16.5)   |
| 11-12                 | 178       | 3.0 (0.9-9.0)   | 214       | 6.5 (3.3-12.5)   | 189       | 6.6 (3.1-13.5)   |
| 13-17                 | 409       | 7.7 (4.6-12.5)  | 441       | 8.3 (6.1-11.3)   | 449       | 9.7 (6.8-13.6)   |
| 18-21                 | 280       | 13.7 (6.7-25.8) | 258       | 14.7 (10.2-20.7) | 212       | 12.8 (7.6-20.7)  |
| 22-26                 | 239       | 8.2 (4.1-15.7)  | 243       | 13.0 (8.9-18.5)  | 245       | 18.2 (13.9-23.6) |
| <b>Race/ethnicity</b> |           |                 |           |                  |           |                  |
| NH White              | 336       | 8.3 (4.1-16.1)  | 420       | 10.2 (8.2-12.6)  | 377       | 11.2 (8.6-14.3)  |
| NH Black              | 376       | 9.7 (4.4-19.8)  | 344       | 9.1 (6.2-13.2)   | 297       | 13.9 (9.7-19.4)  |
| NH Asian              | 195       | 13.9 (9.5-19.8) | 131       | 14.0 (7.9-23.6)  | 162       | 21.8 (16.1-28.8) |
| Mexican American      | 218       | 6.4 (3.3-12.0)  | 280       | 12.0 (7.5-18.7)  | 247       | 14.1 (9.2-20.8)  |
| Other Hispanic        | 129       | 8.2 (3.6-17.7)  | 137       | 16.1 (9.4-26.2)  | 148       | 16.5 (11.4-23.4) |
| Multiracial/Other     | 66        | 5.6 (3.0-10.4)  | 76        | 4.8 (1.5-14.0)   | 68        | 3.4 (1.3-8.6)    |

Note: N refers to the unweighted sample size. Data are weighted row percentages and 95% confidence intervals (CI) of participants with inadequate HPV vaccine data (i.e., individuals excluded from the primary analysis).

## SUPPLEMENTAL MATERIAL

**Supplemental Table 5. Prevalence difference in HPV vaccination ( $\geq 1$  dose) among male and female participants aged 9-26 years between 2011-2012 and 2015-2016 (NHANES).**

|                     | PD (95% CI)        | P-value          | aPD (95% CI)      | P-value          |
|---------------------|--------------------|------------------|-------------------|------------------|
| <b>Females</b>      |                    |                  |                   |                  |
| <b>Age group, y</b> |                    |                  |                   |                  |
| 9-10                | 0.0 (-4.0, 4.0)    | 0.890            | -0.1 (-4.4, 3.2)  | 0.748            |
| 11-12               | 5.5 (-7.9, 18.9)   | 0.411            | 6.1 (-7.0, 19.2)  | 0.351            |
| 13-17               | -2.0 (-13.8, 10.1) | 0.757            | -4.5 (-17.9, 8.9) | 0.503            |
| 18-21               | 13.1 (-0.03, 26.5) | 0.054            | 11.4 (-2.2, 24.9) | 0.099            |
| 22-26               | 20.6 (8.5, 32.7)   | <b>0.001</b>     | 19.4 (7.8, 31.1)  | <b>0.002</b>     |
| <b>Males</b>        |                    |                  |                   |                  |
| <b>Age group, y</b> |                    |                  |                   |                  |
| 9-10                | 2.7 (-4.5, 9.9)    | 0.459            | 5.5 (0.0, 10.9)   | <b>0.050</b>     |
| 11-12               | 16.5 (6.1, 27.0)   | <b>0.003</b>     | 16.9 (5.3, 28.5)  | <b>0.005</b>     |
| 13-17               | 29.8 (19.8, 39.7)  | <b>&lt;0.001</b> | 30.3 (20.6, 40.0) | <b>&lt;0.001</b> |
| 18-21               | 23.4 (11.8, 34.9)  | <b>&lt;0.001</b> | 22.1 (11.0, 33.2) | <b>&lt;0.001</b> |
| 22-26               | 14.0 (4.9, 23.1)   | <b>0.003</b>     | 10.7 (3.3, 18.1)  | <b>0.005</b>     |

Weighted prevalence differences (PD) represent the change in prevalence of HPV vaccination between the 2011-2012 period (reference) and the 2015-2016 period for a given age-group. Each age-stratified multivariable model included study year, race/ethnicity, health insurance status, poverty status, and immigration status.

## SUPPLEMENTAL MATERIAL

**Supplemental Table 6. Sensitivity analysis: comparison of temporal trends in HPV vaccination ( $\geq 1$  dose) using complete case and multiple imputation methods for inadequate HPV vaccination data (NHANES, 2011-2016).**

|                                            | 2011-2012 |                  | 2013-2014 |                  | 2015-2016 |                  | P <sub>trend</sub> <sup>c</sup> |
|--------------------------------------------|-----------|------------------|-----------|------------------|-----------|------------------|---------------------------------|
|                                            | N         | % (95% CI)       | N         | % (95% CI)       | N         | % (95% CI)       |                                 |
| <b>Females</b>                             |           |                  |           |                  |           |                  |                                 |
| <i>Complete case analysis</i> <sup>a</sup> |           |                  |           |                  |           |                  |                                 |
| <b>Overall</b>                             | 1233      | 37.7 (33.8-41.7) | 1331      | 38.7 (33.1-44.6) | 1216      | 45.7 (41.3-50.1) | <b>0.010</b>                    |
| <b>Age group, y</b>                        |           |                  |           |                  |           |                  |                                 |
| 9-10                                       | 194       | 5.0 (2.9-8.6)    | 196       | 2.6 (1.4-4.6)    | 213       | 4.8 (2.7-8.2)    | 0.909                           |
| 11-12                                      | 191       | 22.7 (13.5-35.6) | 190       | 22.0 (16.6-28.6) | 179       | 28.2 (21.3-36.3) | 0.412                           |
| 13-17                                      | 384       | 56.4 (46.9-65.6) | 432       | 49.5 (40.5-58.5) | 391       | 54.6 (47.2-61.7) | 0.743                           |
| 18-21                                      | 229       | 40.6 (31.4-50.5) | 269       | 50.6 (41.2-60.0) | 181       | 53.7 (44.4-62.7) | <b>0.050</b>                    |
| 22-26                                      | 235       | 33.6 (24.8-43.7) | 244       | 36.9 (29.3-45.2) | 252       | 54.2 (46.7-61.5) | <b>0.001</b>                    |
| <i>Multiple imputation</i> <sup>b</sup>    |           |                  |           |                  |           |                  |                                 |
| <b>Overall</b>                             | 1304      | 38.0 (34.3-41.8) | 1405      | 38.8 (33.2-44.3) | 1324      | 46.0 (41.6-50.5) | <b>0.009</b>                    |
| <b>Age group, y</b>                        |           |                  |           |                  |           |                  |                                 |
| 9-10                                       | 207       | 5.3 (2.1-8.6)    | 204       | 4.0 (0.8-7.2)    | 227       | 6.6 (3.0-10.2)   | 0.603                           |
| 11-12                                      | 202       | 23.5 (12.3-34.7) | 202       | 21.9 (15.0-28.8) | 199       | 29.4 (21.4-37.4) | 0.394                           |
| 13-17                                      | 387       | 56.9 (49.0-64.8) | 454       | 48.8 (39.6-57.9) | 421       | 54.3 (47.2-61.4) | 0.623                           |
| 18-21                                      | 249       | 40.2 (31.2-49.3) | 292       | 50.6 (41.2-60.0) | 206       | 51.9 (42.8-61.0) | 0.066                           |
| 22-26                                      | 248       | 34.8 (24.8-44.7) | 253       | 37.9 (30.2-45.6) | 271       | 54.9 (47.6-62.3) | <b>0.002</b>                    |
| <b>Males</b>                               |           |                  |           |                  |           |                  |                                 |
| <i>Complete case analysis</i> <sup>a</sup> |           |                  |           |                  |           |                  |                                 |
| <b>Overall</b>                             | 1214      | 7.8 (6.0-10.2)   | 1248      | 19.7 (17.5-22.3) | 1126      | 27.4 (23.3-31.9) | <b>&lt;0.001</b>                |
| <b>Age group, y</b>                        |           |                  |           |                  |           |                  |                                 |
| 9-10                                       | 202       | 4.8 (1.6-13.9)   | 214       | 4.4 (2.5-7.6)    | 177       | 7.5 (3.9-14.0)   | 0.470                           |
| 11-12                                      | 171       | 13.6 (9.0-20.0)  | 198       | 25.0 (17.5-34.4) | 174       | 30.1 (22.0-39.7) | <b>0.003</b>                    |
| 13-17                                      | 377       | 10.8 (7.1-16.2)  | 406       | 29.5 (24.1-35.6) | 400       | 40.6 (32.0-49.7) | <b>&lt;0.001</b>                |
| 18-21                                      | 243       | 8.2 (4.2-15.2)   | 219       | 23.3 (18.0-29.5) | 175       | 31.5 (22.2-42.5) | <b>&lt;0.001</b>                |
| 22-26                                      | 221       | 2.8 (1.6-4.8)    | 211       | 11.7 (8.5-15.8)  | 200       | 16.8 (9.6-27.8)  | <b>0.004</b>                    |
| <i>Multiple imputation</i> <sup>b</sup>    |           |                  |           |                  |           |                  |                                 |
| <b>Overall</b>                             | 1320      | 8.4 (6.3-10.6)   | 1388      | 20.0 (17.1-23.0) | 1299      | 27.3 (23.3-31.3) | <b>&lt;0.001</b>                |
| <b>Age group, y</b>                        |           |                  |           |                  |           |                  |                                 |
| 9-10                                       | 214       | 5.4 (0.0-11.3)   | 232       | 4.2 (1.1-7.3)    | 204       | 9.2 (4.0-14.5)   | 0.329                           |
| 11-12                                      | 178       | 14.1 (8.2-19.9)  | 214       | 25.3 (16.9-33.7) | 189       | 30.1 (20.9-39.2) | <b>0.005</b>                    |
| 13-17                                      | 409       | 10.9 (6.3-15.5)  | 441       | 29.0 (23.2-34.8) | 449       | 39.0 (30.5-47.5) | <b>&lt;0.001</b>                |
| 18-21                                      | 280       | 8.7 (3.4-14.0)   | 258       | 22.9 (16.4-29.4) | 212       | 31.8 (21.7-41.8) | <b>&lt;0.001</b>                |
| 22-26                                      | 239       | 4.1 (0.9-7.3)    | 243       | 13.5 (8.8-18.1)  | 245       | 18.7 (10.2-27.1) | <b>0.004</b>                    |

Data are unweighted sample sizes (N) and weighted row percentages and 95% confidence intervals (CI).

<sup>a</sup> The complete case analysis is equivalent to the primary analysis that excluded persons with inadequate HPV vaccination data (see Figure 1).

<sup>b</sup> Multiple imputation for missing data (including inadequate HPV vaccination data) was conducted using chained equations (m=20). All variables in the primary analysis were included (age, sex, race/ethnicity, poverty status, health insurance status, immigration status). Additional auxiliary variables were included to improve the stability of the imputation model (i.e., use of a proxy in the family interview, language of the family interview [English/Spanish], receipt of the hepatitis A vaccine, receipt of the hepatitis B dose series, and the number of children aged 6-17 in the household).

<sup>c</sup> Linear test for trend.

## SUPPLEMENTAL MATERIAL

**Supplemental Table 7. Sensitivity analysis: temporal trends in the percentage of males and females who initiated the HPV vaccine ( $\geq 1$  dose) prior to their 27<sup>th</sup> birthday among participants aged 9-59 years (NHANES, 2011-2016).**

|         | 2011-2012 |                  | 2013-2014 |                  | 2015-2016 |                  | P <sub>trend</sub> |
|---------|-----------|------------------|-----------|------------------|-----------|------------------|--------------------|
|         | N         | % (95% CI)       | N         | % (95% CI)       | N         | % (95% CI)       |                    |
| Females | 2744      | 14.3 (12.0-16.9) | 2949      | 15.4 (13.3-17.7) | 2778      | 18.2 (16.2-20.3) | <b>0.018</b>       |
| Males   | 2622      | 3.1 (2.3-4.1)    | 2709      | 7.2 (6.3-8.4)    | 2477      | 9.9 (8.4-11.5)   | <b>&lt;0.001</b>   |

The primary analysis excluded participants older than 26 who may have been vaccinated prior to the upper recommended age-limit for HPV vaccination. Thus, a sensitivity analysis was conducted to estimate temporal trends in the percentage of males and females in the U.S. who initiated the HPV vaccine ( $\geq 1$  dose) prior to their 27<sup>th</sup> birthday. Similar to the primary analysis, this analysis excluded participants with inadequate HPV vaccination data. Contrary to the primary analysis, this analysis did not have exclusion criteria based on the participant's age at the time of the interview, and included all participants aged 9-59 years at the time of the interview since all members of this age group were eligible to respond to the HPV vaccination questionnaire. Persons were considered to have the outcome if they reported receiving the first dose of the HPV vaccine at an age  $\leq 26$  years. In addition, participants who were between 9-26 years of age at the time of the interview and reported previously receiving  $\geq 1$  vaccine dose, but had missing data on their age at HPV vaccine initiation, were also considered to have the outcome of interest.



## SUPPLEMENTAL MATERIAL

**Supplemental Figure 1. Sensitivity analysis: Comparison of estimates for HPV vaccination ( $\geq 1$  dose) among participants 13-17 years of age in the NHANES database and the National Immunization Survey—Teen (2011-2016).**

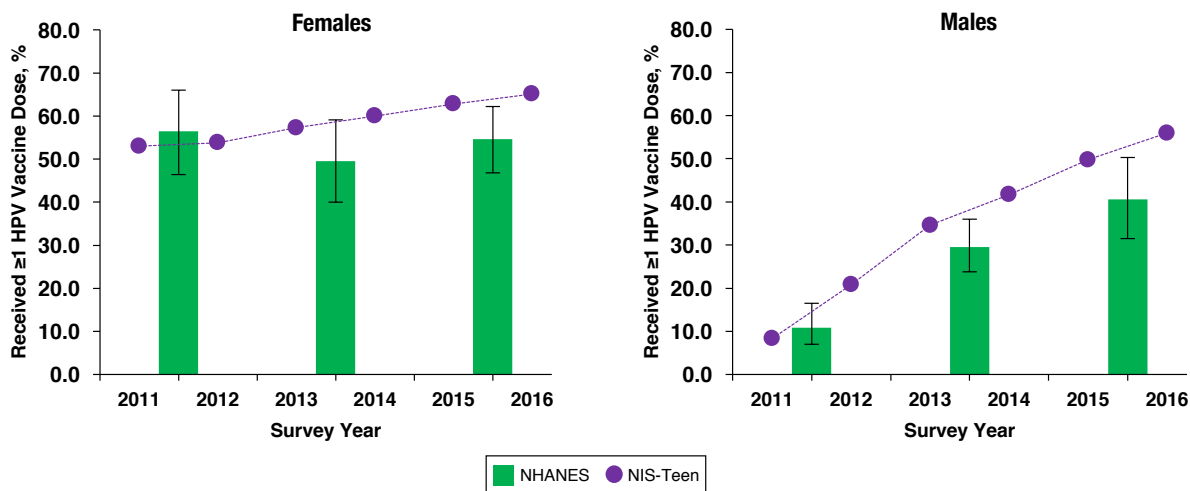

Data shown from NHANES reflect estimates calculated in the primary (complete case) analysis. The NIS-Teen assesses coverage of HPV vaccination using random digit dialing to identify and interview households with children eligible for vaccination. Vaccination histories are verified through a follow-up survey mailed to a medical provider. The NIS-Teen revised their definition for obtaining “adequate provider data” beginning in 2013, so temporal trends before and after this period must be interpreted with caution. See the following report for more information: Walker et al. (2017). National, regional, state, and selected local area vaccination coverage among adolescents aged 13–17 years—United States, 2016. MMWR. Morbidity and mortality weekly report, 66.
